# Supplementary material for: Functional Neuroimaging of Major Depressive Disorder: A Meta-Analysis and New Integration of Baseline Activation and Neural Response Data
Source: Atypon-hosted journal article supplement (doi:10.1176/appi.ajp.2012.11071105), 2012-04-25
Supplement: appi.ajp.2012.11071105.ds001.pdf [file appi.ajp.2012.11071105.ds001.pdf]

### Supplementary Table

#### Significant Regional Cerebral Blood Flow Anomalies in Major Depressive Disorder Supported by Only Two Studies

MDD, subjects with major depressive disorder. CTL, control subjects.

| Structure                        | Direction of Effect | Talairach coordinates | Cluster size (mm <sup>3</sup> ) |
|----------------------------------|---------------------|-----------------------|---------------------------------|
| Subcallosal Gyrus                | MDD > CTL           | (23, 8, -12)          | 2281                            |
| Dorsolateral Prefrontal Cortex   | MDD > CTL           | (43, 41, 14)          | 856                             |
| Parahippocampal Gyrus            | MDD > CTL           | (-13, -41, -2)        | 594                             |
| Dorsolateral Prefrontal Cortex   | MDD < CTL           | (-37, 33, 23)         | 1364                            |
| Dorsal Anterior Cingulate Cortex | MDD < CTL           | (3, 22, 20)           | 394                             |

### Supplementary Figure

#### Structures Showing Differential Responding, as Assessed With fMRI, to Positive Stimuli in Depressed Relative to Control Samples

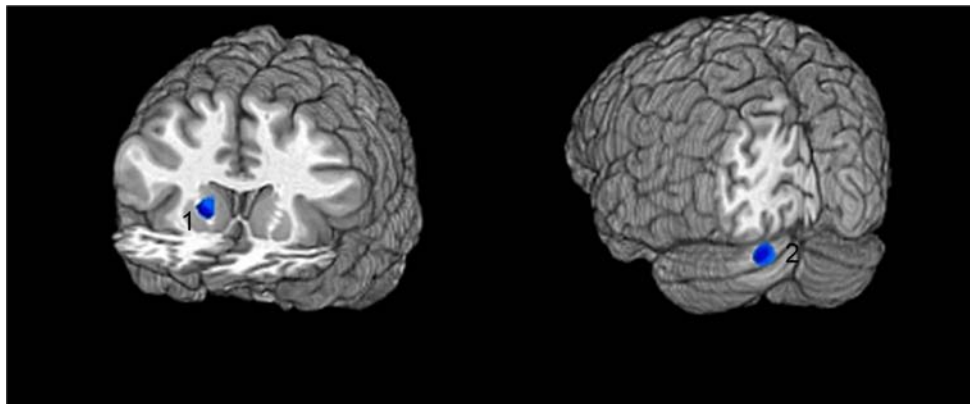

| Structure           | Direction of Effect | Valence specific effect? | Talairach coordinates | Cluster size (mm <sup>3</sup> ) | Figure |
|---------------------|---------------------|--------------------------|-----------------------|---------------------------------|--------|
| Caudate and Putamen | CTL > MDD           | Yes                      | (18, 12, 5)           | 211                             | 1      |
| Cerebellar Uvula    | CTL > MDD           | Yes                      | (-19, -80, -25)       | 544                             | 2      |

CTL, control subjects. MDD, subjects with major depressive disorder.
